# Supplementary material for: Quantitative comparison of the biomass-degrading enzyme repertoires of five filamentous fungi
Source: PubMed Central journal article supplement (PMC7679414; doi:10.1038/s41598-020-75217-z), 2020-11-20
Supplement: 41598_2020_75217_MOESM2_ESM.pdf [file 41598_2020_75217_MOESM2_ESM.pdf]

# **Quantitative comparison of the biomass-degrading enzyme repertoires of five filamentous fungi**

Magnus Ø. Arntzen<sup>1\*#</sup>, Oskar Bengtsson<sup>1#</sup>, Anikó Várnai<sup>1</sup>, Francesco Delogu<sup>1</sup>, Geir Mathiesen<sup>1</sup>, Vincent G. H. Eijsink<sup>1</sup>

<sup>1</sup>Faculty of Chemistry, Biotechnology and Food Science, Norwegian University of Life Sciences (NMBU), Ås, Norway.

# Fig S1 - *Aspergillus terreus*

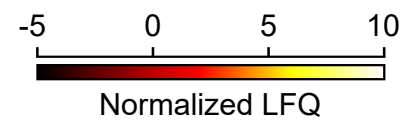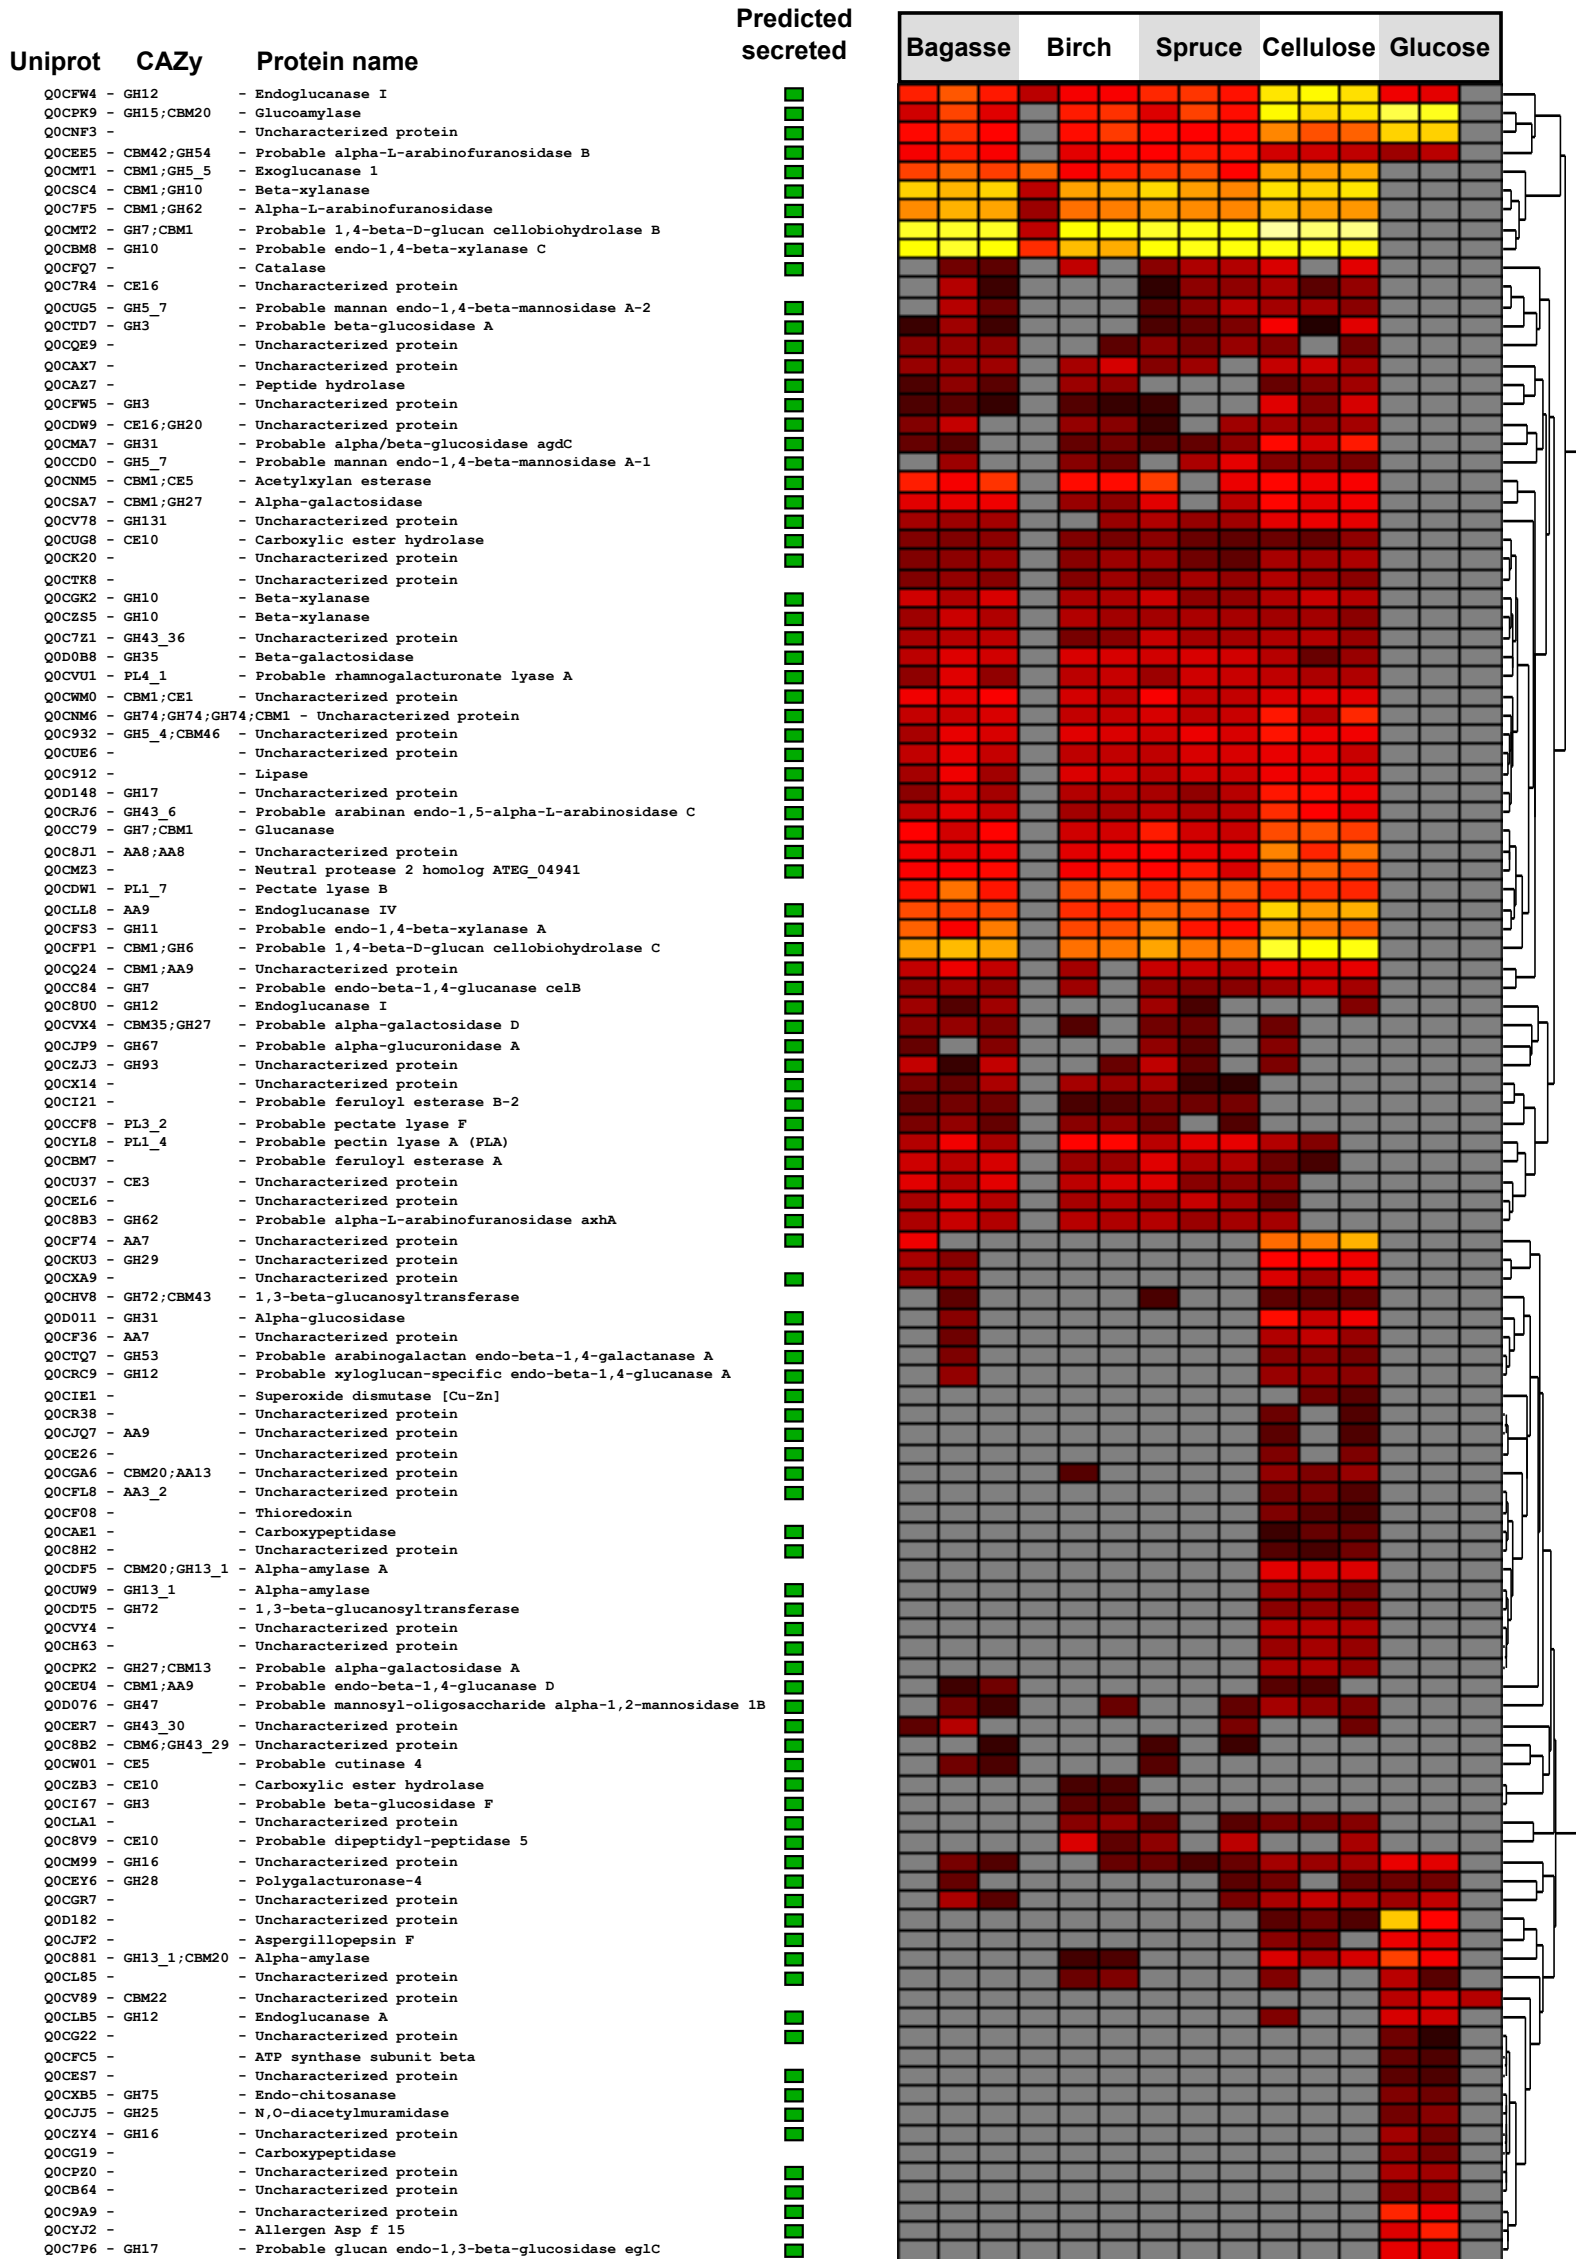

Fig S2 - *Trichoderma reesei*

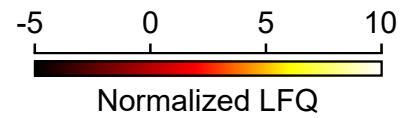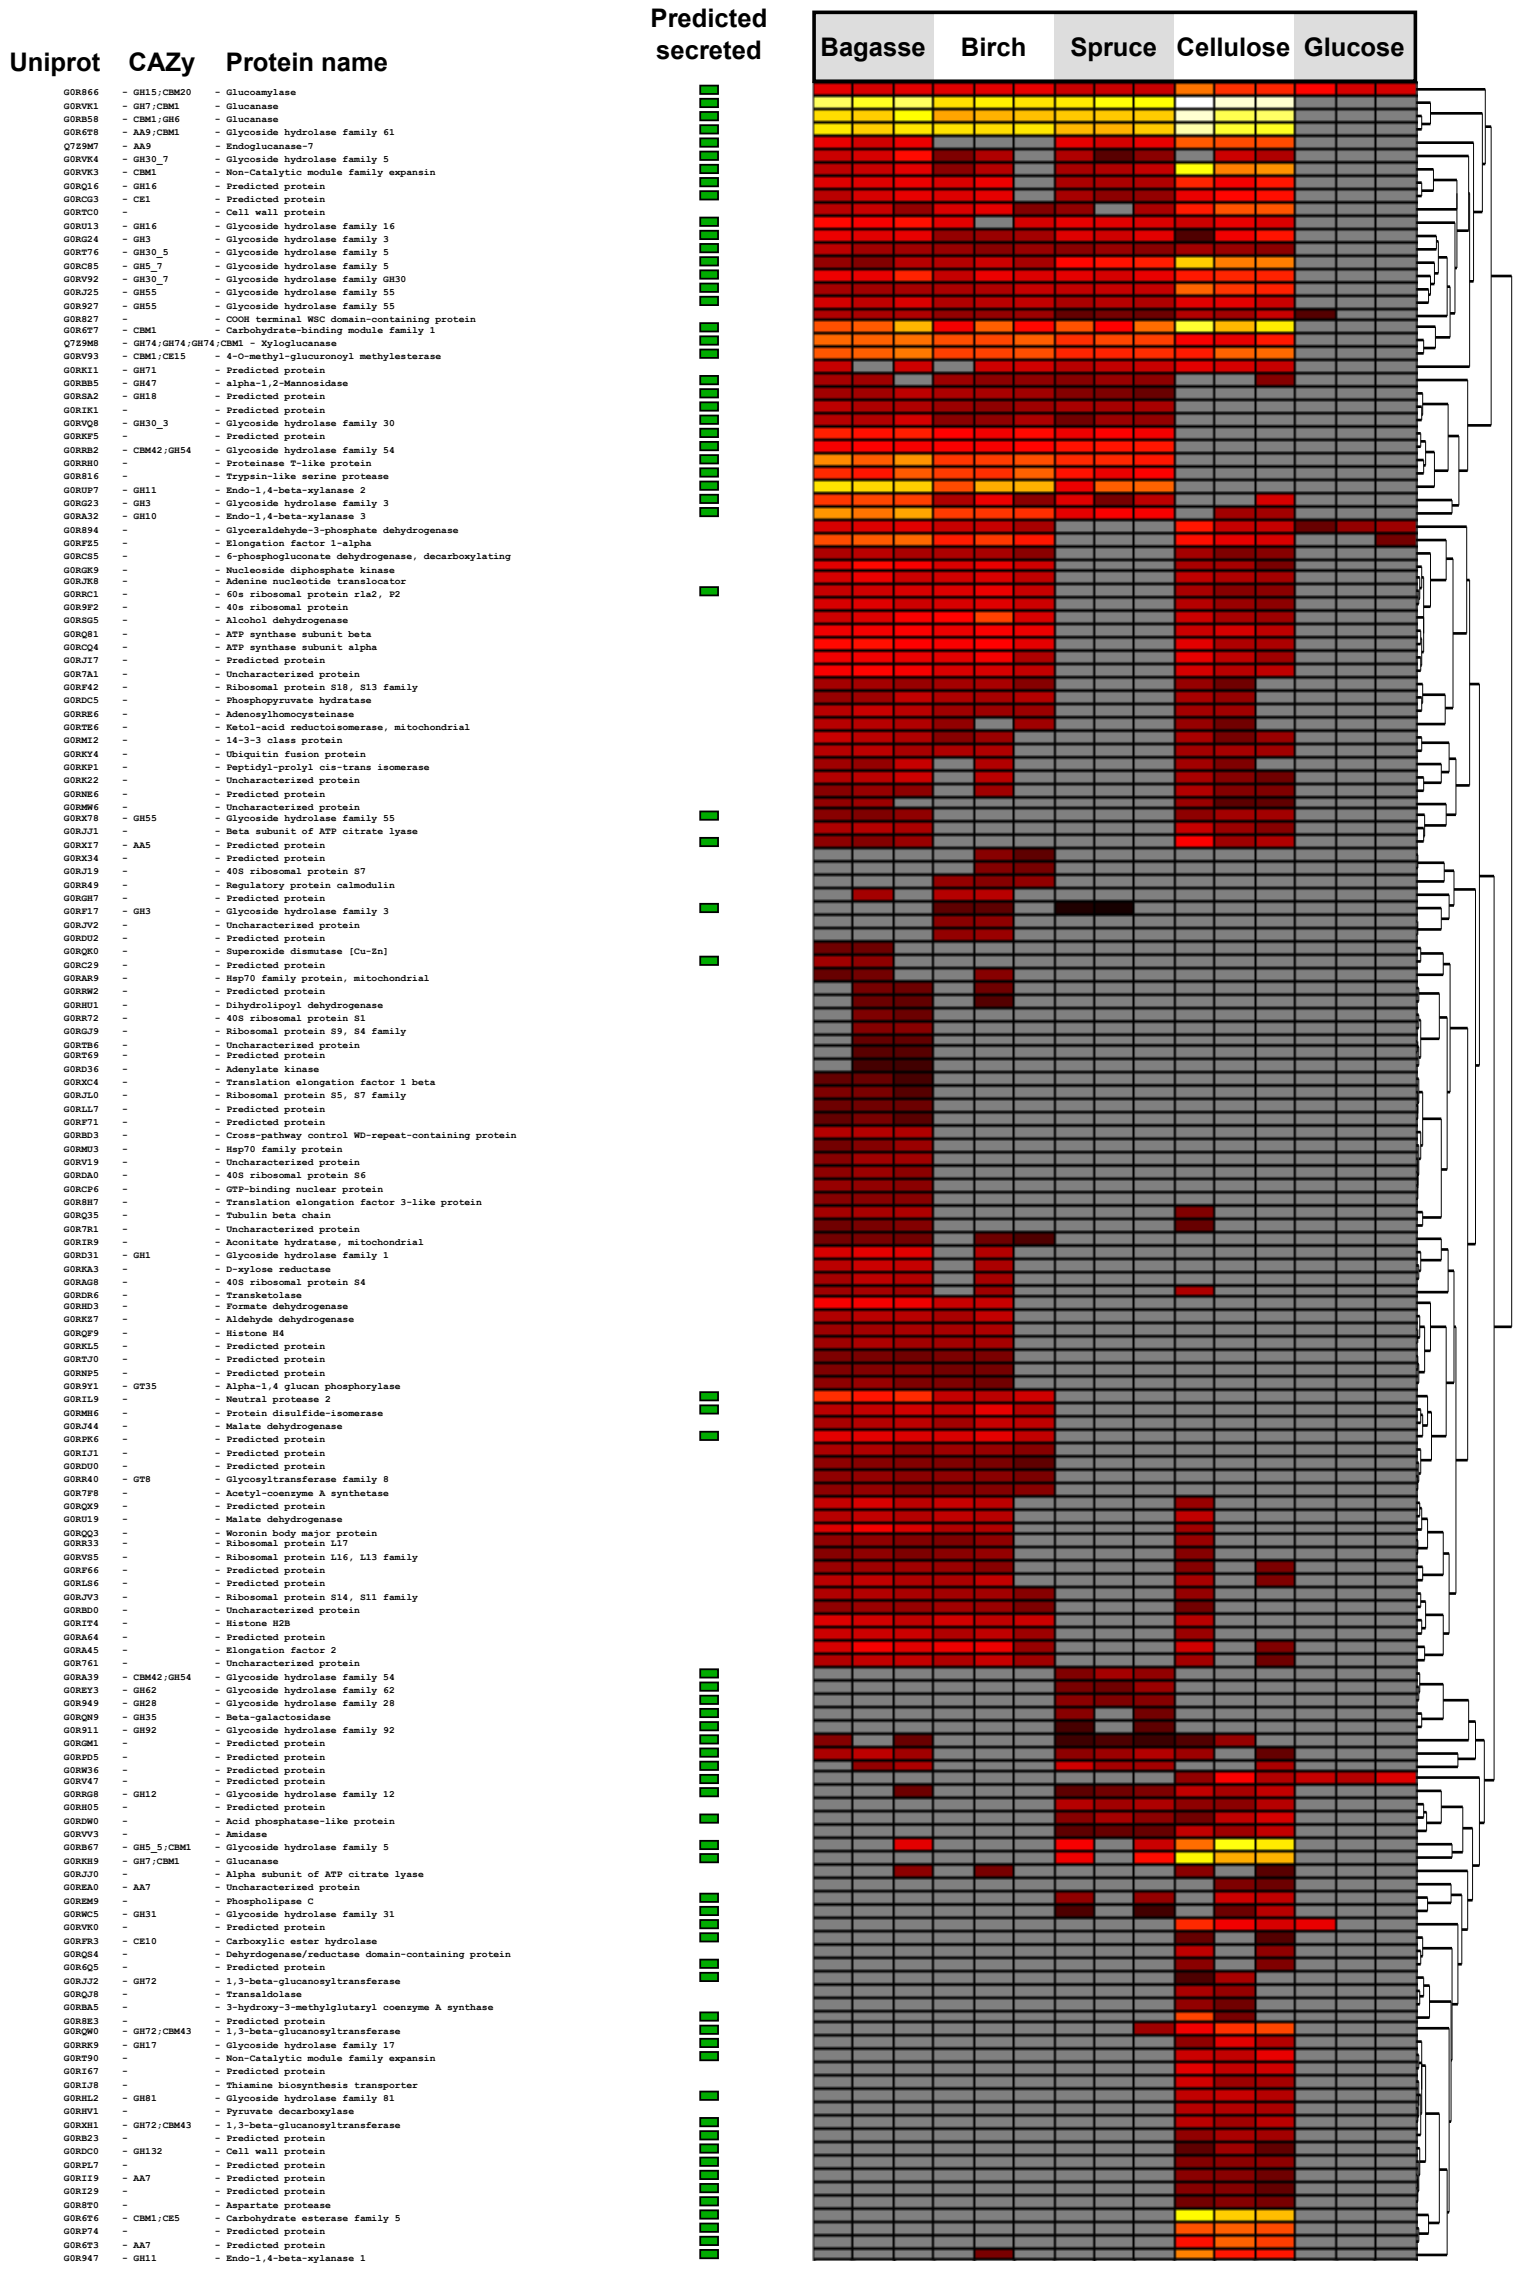

Fig S3 - *Myceliophthora thermophila*

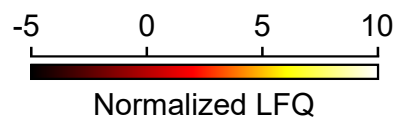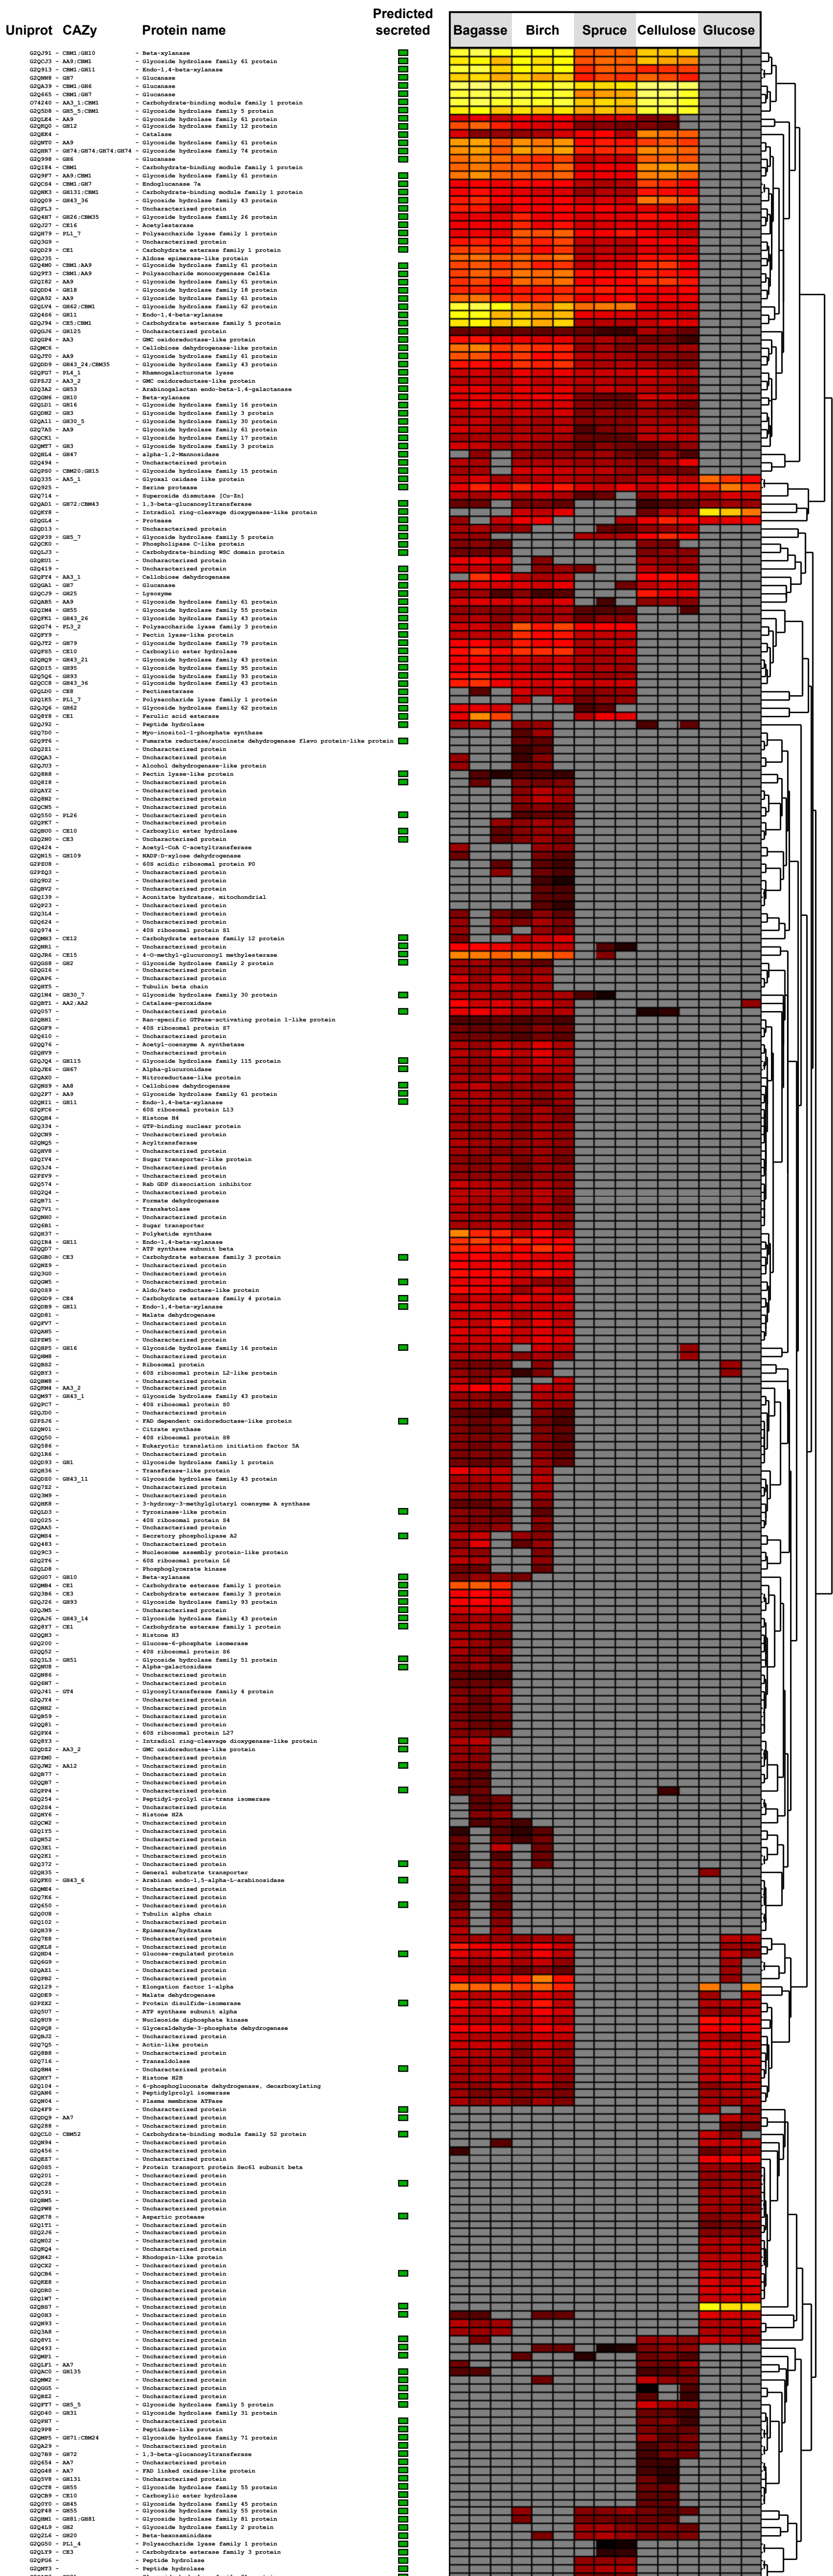

# Fig S4 - Neurospora crassa

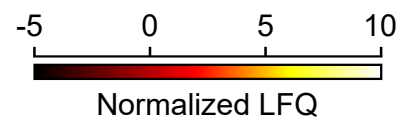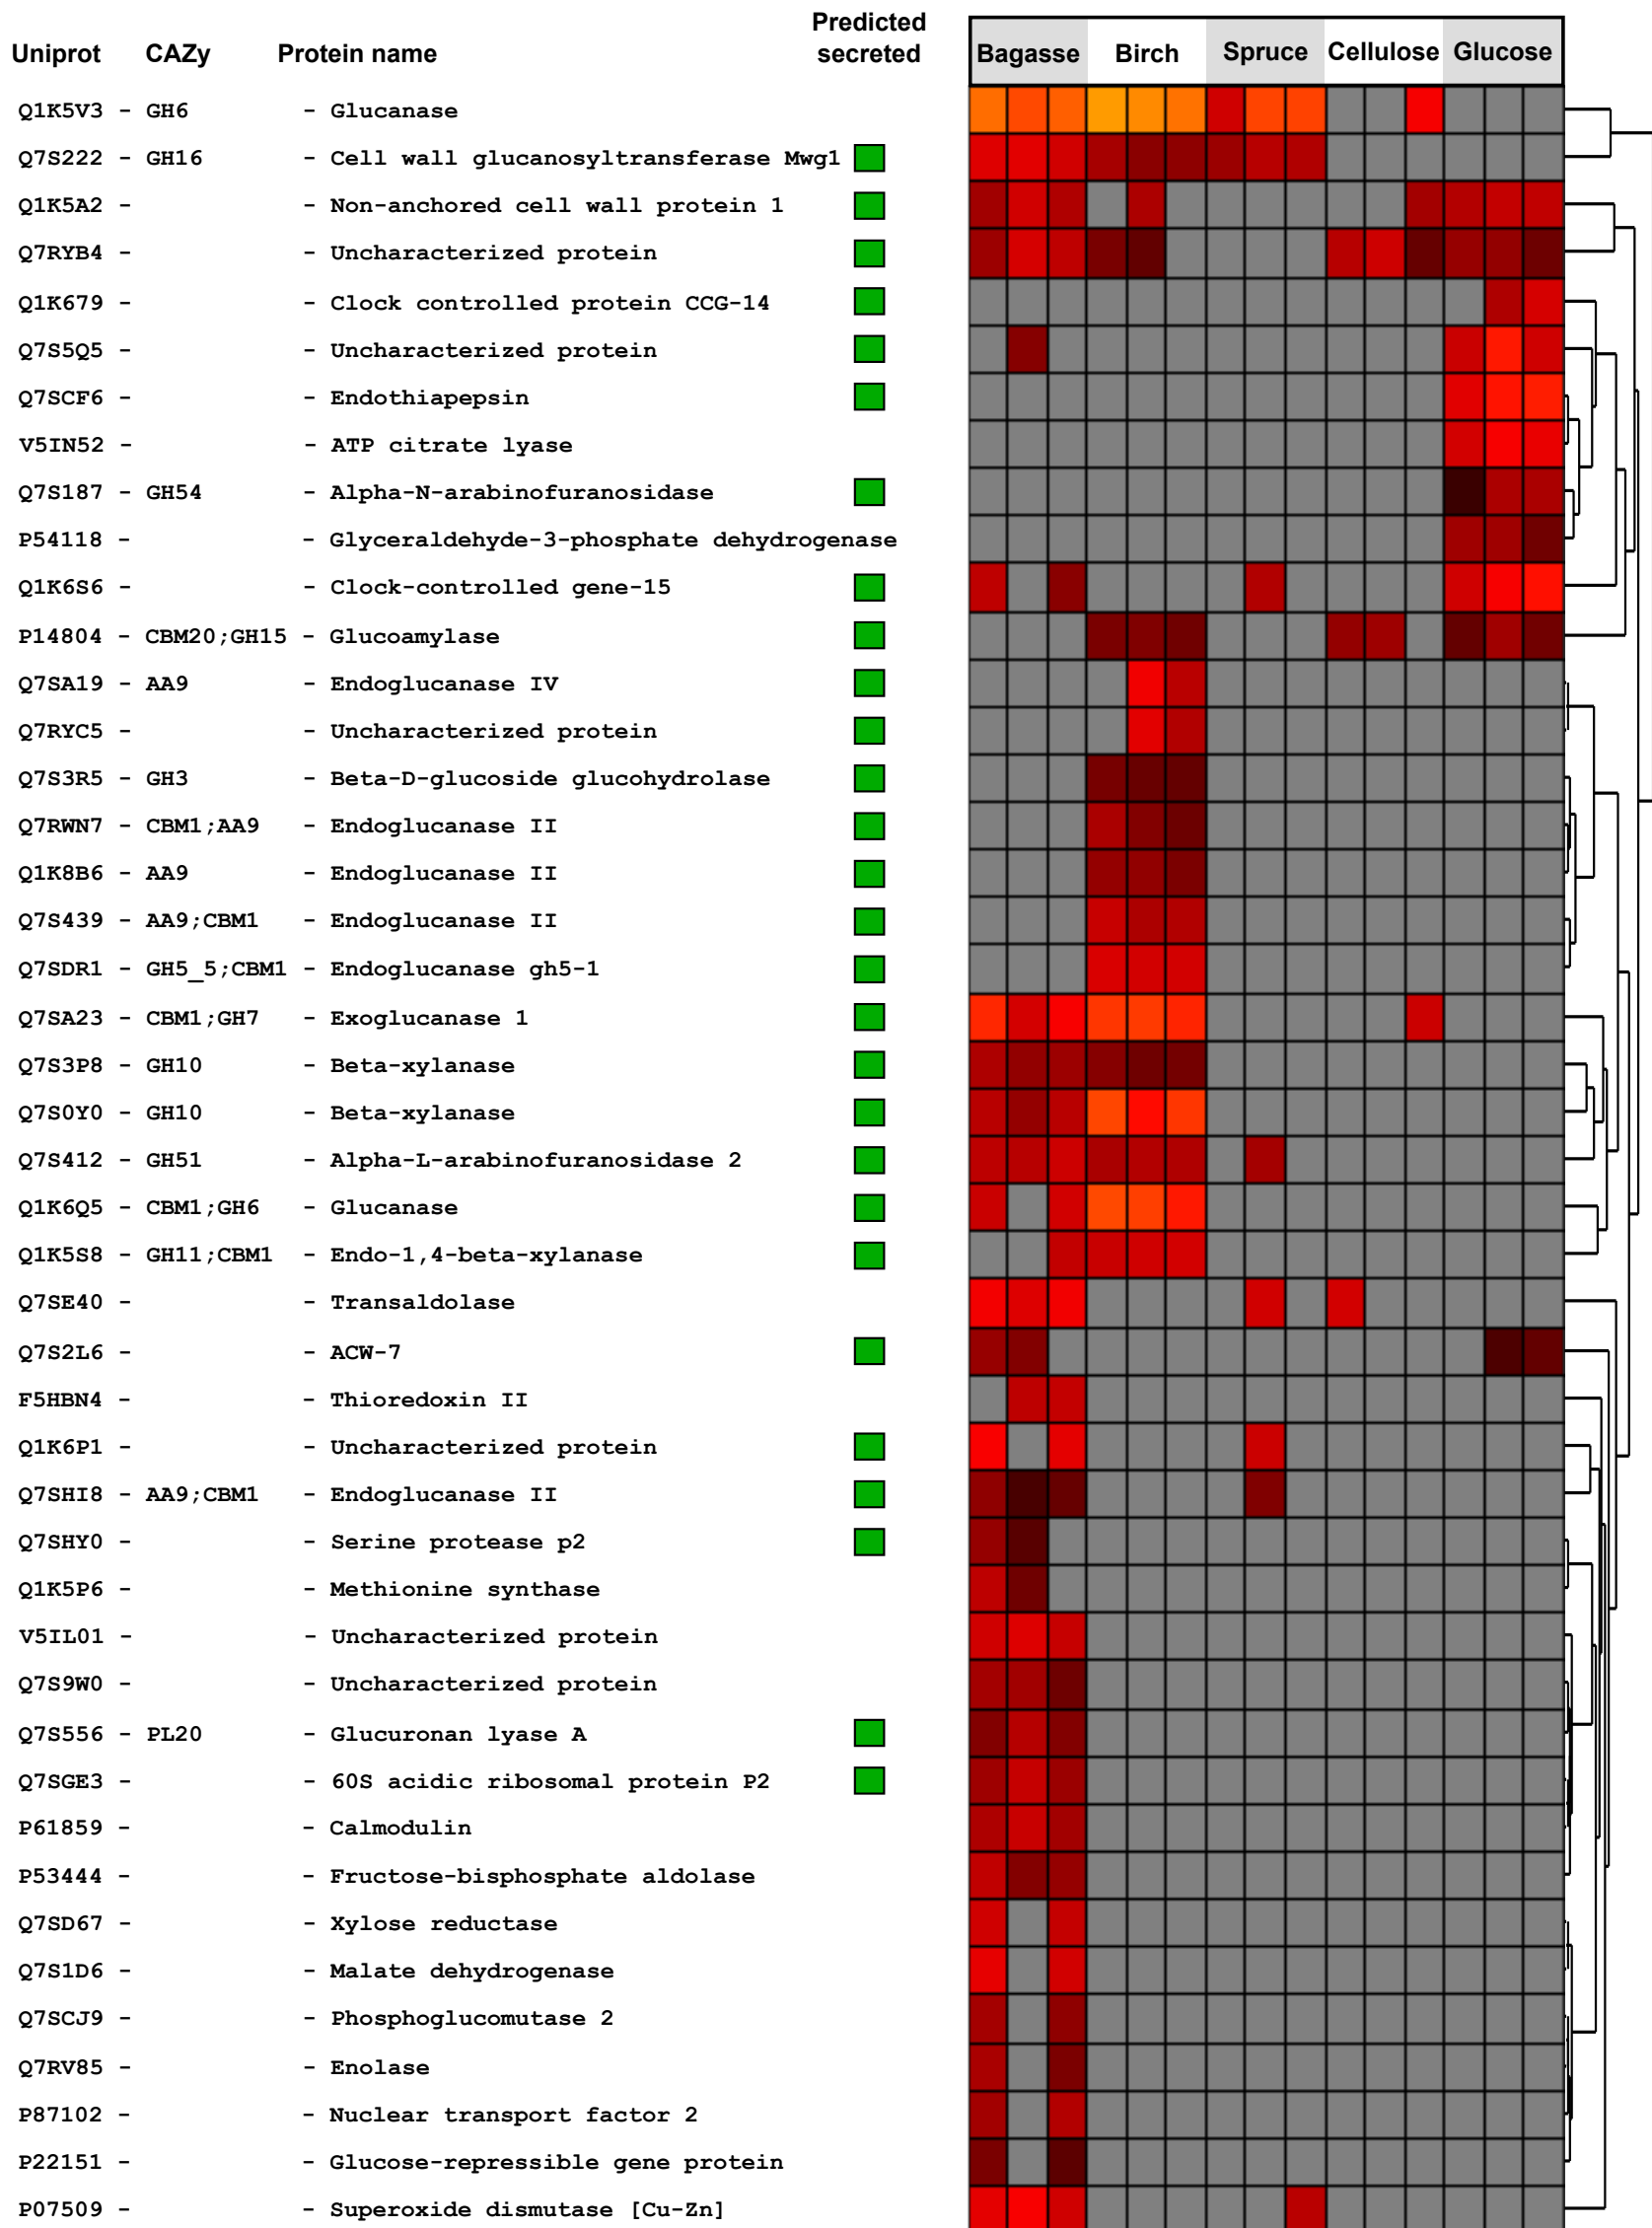

# Fig S5 - Phanerochaete chrysosporium

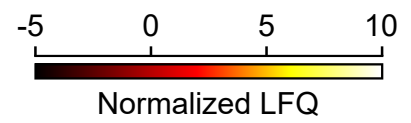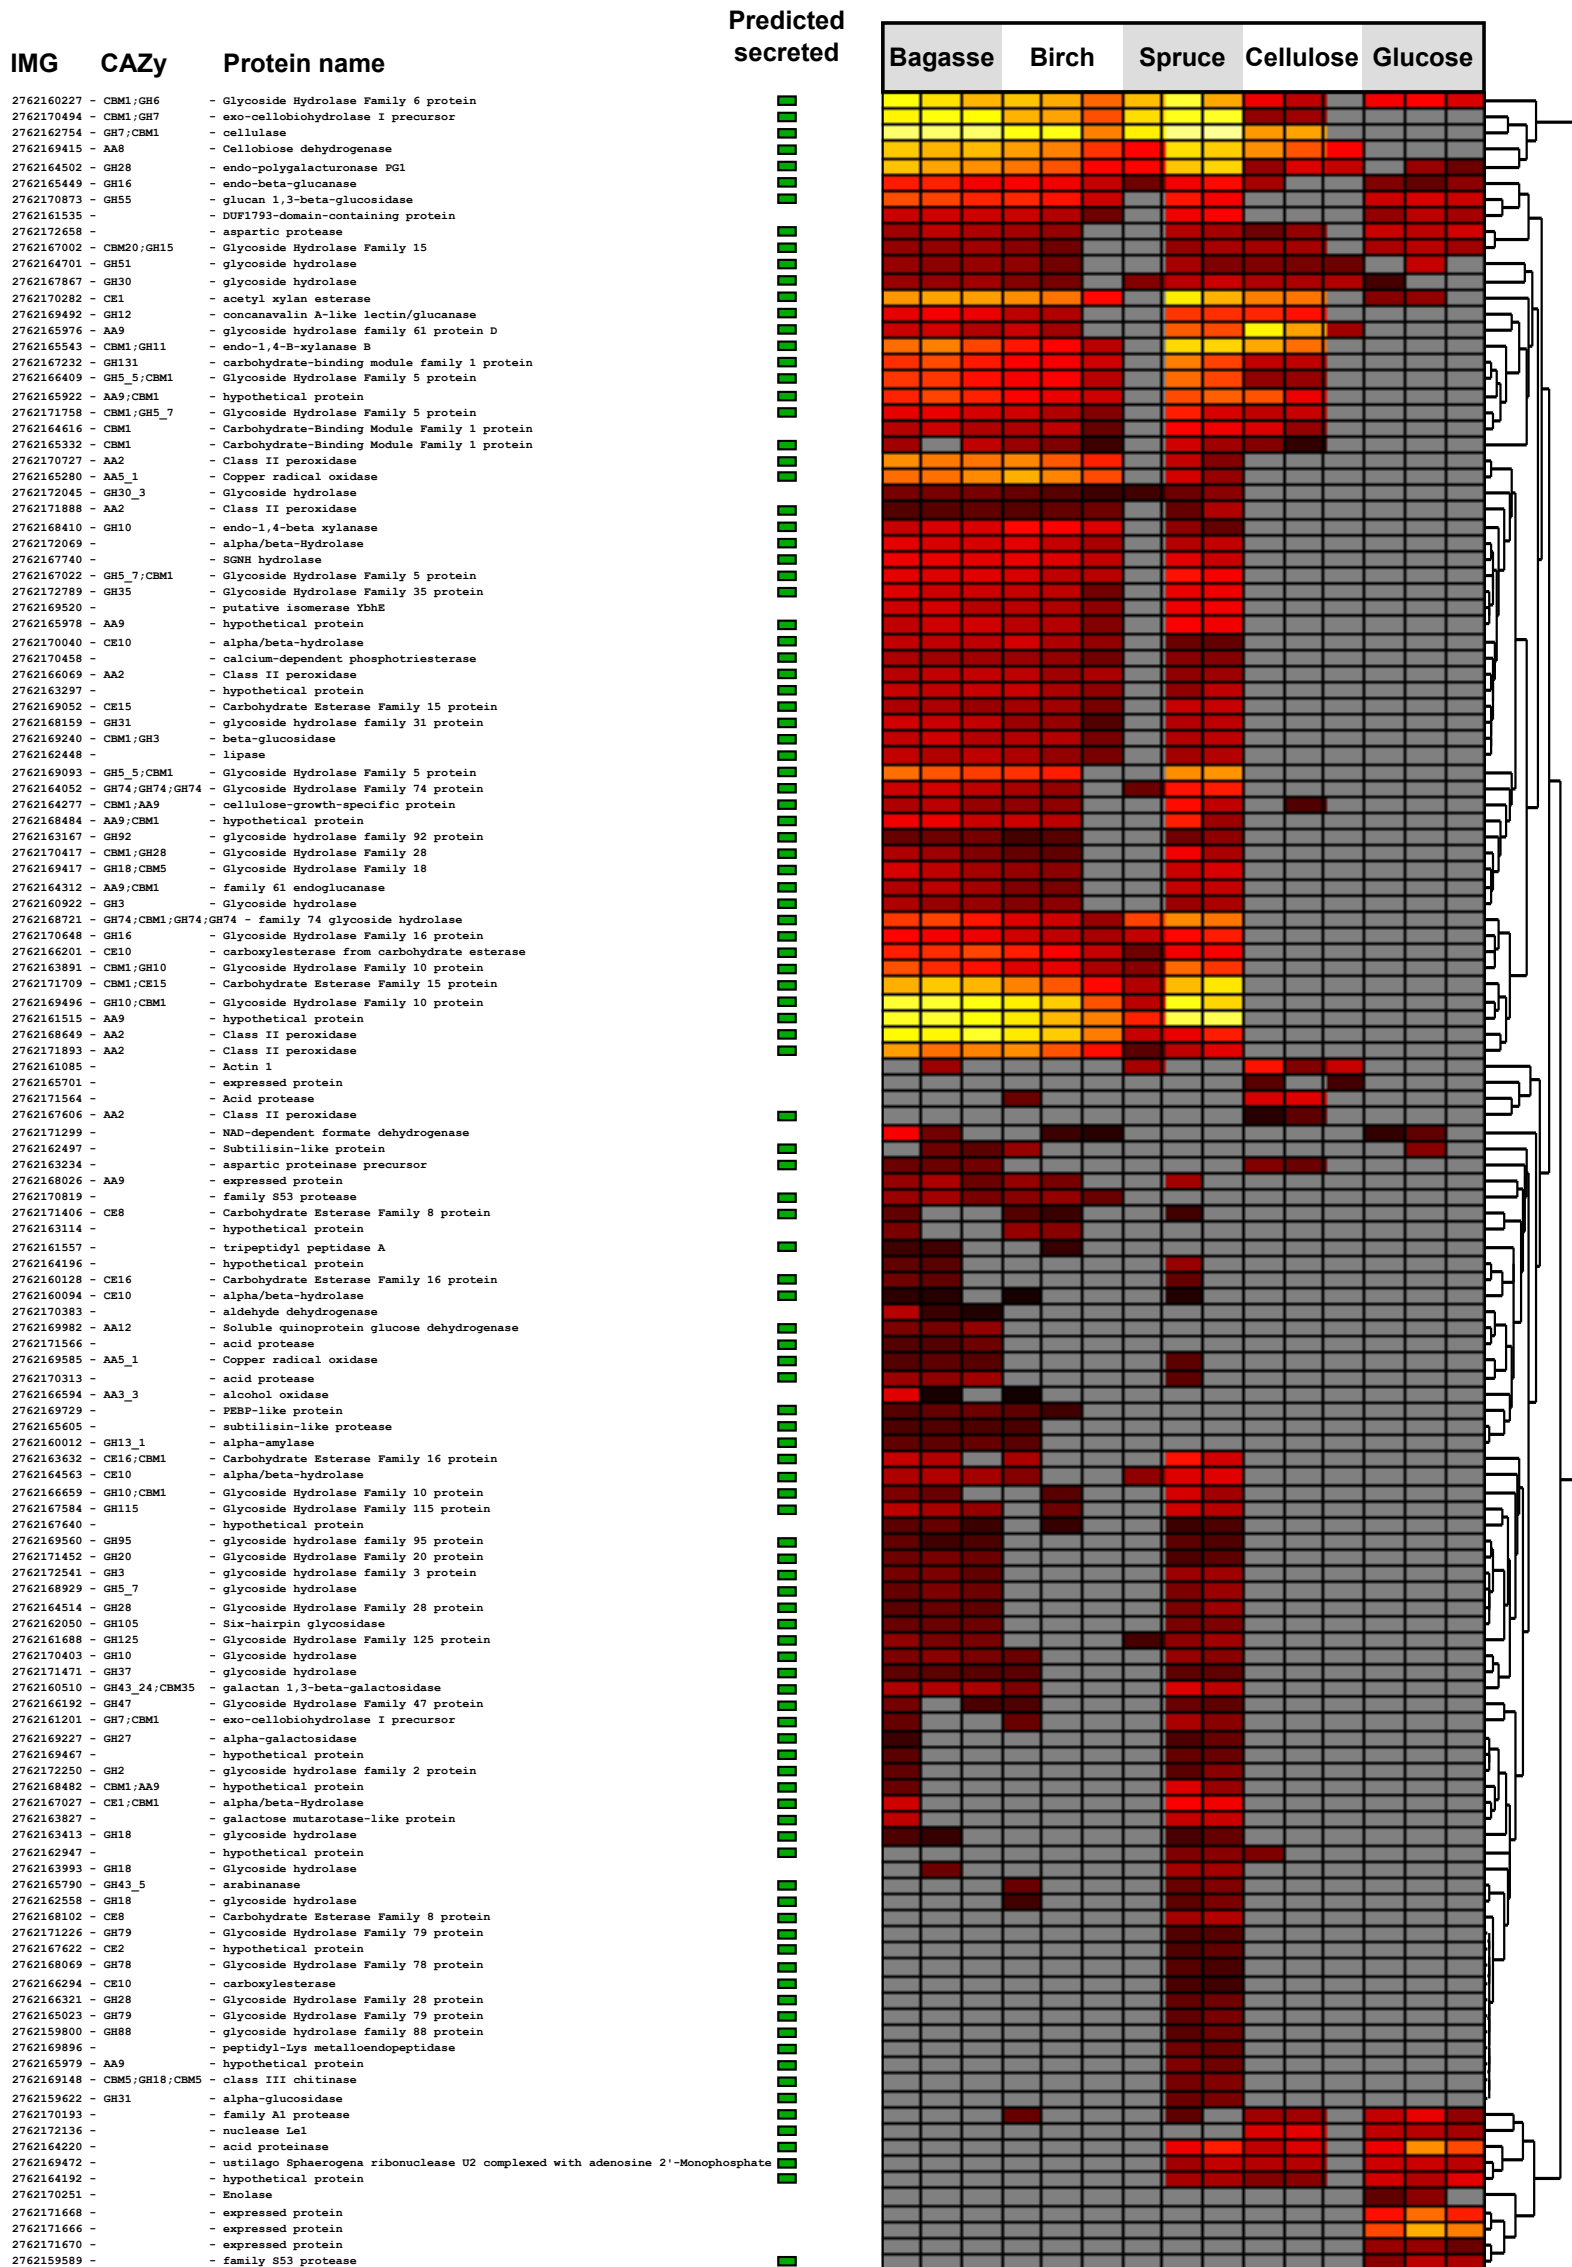

Fig S6

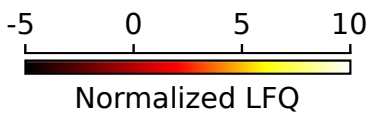

Acc. number      Protein name

Organism

Bagasse      Birch      Spruce      Cellulose      Glucose

I

II

III

|            |                                                                       |                                       |
|------------|-----------------------------------------------------------------------|---------------------------------------|
| 2762161557 | tripeptidyl peptidase A                                               | <span style="color: green;">■</span>  |
| G2Q8R8     | Pectin lyase-like protein                                             | <span style="color: yellow;">■</span> |
| 2762169729 | PEBP-like protein                                                     | <span style="color: green;">■</span>  |
| 2762165605 | subtilisin-like protease                                              | <span style="color: green;">■</span>  |
| 2762170819 | family S53 protease                                                   | <span style="color: green;">■</span>  |
| G2Q8I8     | Uncharacterized protein                                               | <span style="color: yellow;">■</span> |
| G2Q372     | Uncharacterized protein                                               | <span style="color: yellow;">■</span> |
| G2QLD3     | Tyrosinase-like protein                                               | <span style="color: yellow;">■</span> |
| G2PZJ6     | FAD dependent oxidoreductase-like protein                             | <span style="color: yellow;">■</span> |
| G0RIL9     | Neutral protease 2                                                    | <span style="color: orange;">■</span> |
| G0RPF6     | Predicted protein                                                     | <span style="color: orange;">■</span> |
| G0RMH6     | Protein disulfide-isomerase                                           | <span style="color: orange;">■</span> |
| G2QMS4     | Secretory phospholipase A2                                            | <span style="color: yellow;">■</span> |
| G2QGW5     | Uncharacterized protein                                               | <span style="color: yellow;">■</span> |
| G2Q057     | Uncharacterized protein                                               | <span style="color: yellow;">■</span> |
| G0RRC1     | 60s ribosomal protein rla2, P2                                        | <span style="color: orange;">■</span> |
| G2QJ92     | Peptide hydrolase                                                     | <span style="color: yellow;">■</span> |
| Q0CAZ7     | Peptide hydrolase                                                     | <span style="color: blue;">■</span>   |
| G2QJM5     | Uncharacterized protein                                               | <span style="color: yellow;">■</span> |
| Q7SGE3     | 60S acidic ribosomal protein P2                                       | <span style="color: grey;">■</span>   |
| G2Q8Y3     | Intradiol ring-cleavage dioxygenase-like protein                      | <span style="color: yellow;">■</span> |
| G2QNU8     | Alpha-galactosidase                                                   | <span style="color: yellow;">■</span> |
| G0RC29     | Predicted protein                                                     | <span style="color: orange;">■</span> |
| Q7SHY0     | Serine protease p2                                                    | <span style="color: grey;">■</span>   |
| G2Q650     | Uncharacterized protein                                               | <span style="color: yellow;">■</span> |
| 2762171566 | acid protease                                                         | <span style="color: green;">■</span>  |
| G2Q9T6     | Fumarate reductase/succinate dehydrogenase flavo protein-like protein | <span style="color: yellow;">■</span> |
| Q7RYC5     | Uncharacterized protein                                               | <span style="color: grey;">■</span>   |
| G0REM9     | Phospholipase C                                                       | <span style="color: orange;">■</span> |
| G0RDW0     | Acid phosphatase-like protein                                         | <span style="color: orange;">■</span> |
| 2762162947 | hypothetical protein                                                  | <span style="color: green;">■</span>  |
| G2Q493     | Uncharacterized protein                                               | <span style="color: yellow;">■</span> |
| G2QMP1     | Uncharacterized protein                                               | <span style="color: yellow;">■</span> |
| Q0CLA1     | Uncharacterized protein                                               | <span style="color: blue;">■</span>   |
| G2QMW2     | Uncharacterized protein                                               | <span style="color: yellow;">■</span> |
| Q0CXA9     | Uncharacterized protein                                               | <span style="color: blue;">■</span>   |
| G2QPP4     | Uncharacterized protein                                               | <span style="color: yellow;">■</span> |
| G2QLJ3     | Carbohydrate-binding WSC domain protein                               | <span style="color: yellow;">■</span> |
| G2QCK0     | Phospholipase C-like protein                                          | <span style="color: yellow;">■</span> |
| 2762163234 | aspartic proteinase precursor                                         | <span style="color: green;">■</span>  |
| G0RPF4     | Predicted protein                                                     | <span style="color: orange;">■</span> |
| G0RT90     | Non-Catalytic module family expansin                                  | <span style="color: orange;">■</span> |
| G0R8E3     | Predicted protein                                                     | <span style="color: orange;">■</span> |
| Q0CVY4     | Uncharacterized protein                                               | <span style="color: blue;">■</span>   |
| G0RB23     | Predicted protein                                                     | <span style="color: orange;">■</span> |
| Q0CH63     | Uncharacterized protein                                               | <span style="color: blue;">■</span>   |
| G2QGG5     | Uncharacterized protein                                               | <span style="color: yellow;">■</span> |
| G0RPL7     | Predicted protein                                                     | <span style="color: orange;">■</span> |
| G0R6Q5     | Predicted protein                                                     | <span style="color: orange;">■</span> |
| G0RI29     | Predicted protein                                                     | <span style="color: orange;">■</span> |
| G0R8T0     | Aspartate protease                                                    | <span style="color: orange;">■</span> |
| Q0CE26     | Uncharacterized protein                                               | <span style="color: blue;">■</span>   |
| G2QBZ2     | Uncharacterized protein                                               | <span style="color: yellow;">■</span> |
| G2QPH7     | Uncharacterized protein                                               | <span style="color: yellow;">■</span> |
| G2Q9P8     | Peptidase-like protein                                                | <span style="color: yellow;">■</span> |
| G2QA29     | Uncharacterized protein                                               | <span style="color: yellow;">■</span> |
| Q0CIE1     | Superoxide dismutase [Cu-Zn]                                          | <span style="color: blue;">■</span>   |
| Q0CR38     | Uncharacterized protein                                               | <span style="color: blue;">■</span>   |
| Q0CAE1     | Carboxypeptidase                                                      | <span style="color: blue;">■</span>   |
| Q0C8H2     | Uncharacterized protein                                               | <span style="color: blue;">■</span>   |
| G2QNT3     | Peptide hydrolase                                                     | <span style="color: yellow;">■</span> |
| G2QFG6     | Peptide hydrolase                                                     | <span style="color: yellow;">■</span> |
| 2762169896 | peptidyl-Lys metalloendopeptidase                                     | <span style="color: green;">■</span>  |
| G0RGM1     | Predicted protein                                                     | <span style="color: orange;">■</span> |
| G0RW36     | Predicted protein                                                     | <span style="color: orange;">■</span> |
| G0RPD5     | Predicted protein                                                     | <span style="color: orange;">■</span> |
| 2762163827 | galactose mutarotase-like protein                                     | <span style="color: green;">■</span>  |
| Q1K6P1     | Uncharacterized protein                                               | <span style="color: grey;">■</span>   |
| 2762169467 | hypothetical protein                                                  | <span style="color: green;">■</span>  |
| 2762170313 | acid protease                                                         | <span style="color: green;">■</span>  |

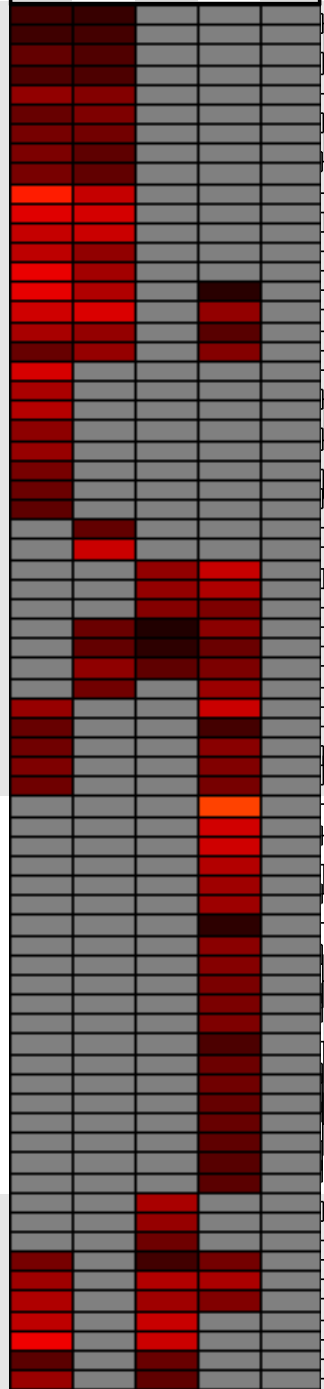

■ *A. terreus*

■ *M. thermophila*

■ *P. chrysosporium*

■ *T. reesei*

■ *N. crassa*
